# Supplementary material for: Understanding the Influence of Socioeconomic Variables on Medicinal Plant Knowledge in the Peruvian Andes
Source: MDPI journal article supplement (doi:10.3390/plants11202681), 2022-10-12
Supplement: s1 [file s1]

# Supplementary Materials

**Table S1.** Number of participants interviewed for each socioeconomic variable in 12 localities of the northern Peruvian Andes.

| Attributes                 | Lowlands—Bongará |            |        | Lowlands—R. Mendoza |            |        | Highlands—Chachapoyas |         |           | Highlands—Luya |       |         |
|----------------------------|------------------|------------|--------|---------------------|------------|--------|-----------------------|---------|-----------|----------------|-------|---------|
|                            | Cuispes          | San Carlos | Valera | Huambo              | Santa Rosa | Totora | Granada               | Olleros | Quinjalca | Longuita       | María | Yomblón |
| Age                        | 50               | 50         | 50     | 50                  | 50         | 50     | 50                    | 50      | 50        | 50             | 50    | 50      |
| Family size                | 50               | 50         | 50     | 50                  | 50         | 50     | 50                    | 50      | 50        | 50             | 50    | 50      |
| Gender                     |                  |            |        |                     |            |        |                       |         |           |                |       |         |
| Female                     | 25               | 25         | 25     | 25                  | 24         | 27     | 25                    | 23      | 27        | 26             | 23    | 24      |
| Male                       | 25               | 25         | 25     | 25                  | 26         | 23     | 25                    | 27      | 23        | 24             | 27    | 26      |
| Education                  |                  |            |        |                     |            |        |                       |         |           |                |       |         |
| No education               | 3                | 0          | 1      | 0                   | 1          | 0      | 14                    | 14      | 11        | 10             | 4     | 6       |
| Primary education          | 30               | 28         | 34     | 26                  | 45         | 43     | 27                    | 24      | 18        | 29             | 27    | 25      |
| High education             | 17               | 22         | 15     | 24                  | 4          | 7      | 9                     | 12      | 11        | 11             | 19    | 19      |
| Occupation                 |                  |            |        |                     |            |        |                       |         |           |                |       |         |
| Basic qualification        | 48               | 42         | 43     | 46                  | 48         | 49     | 50                    | 49      | 49        | 45             | 45    | 44      |
| Medium/high qualification  | 2                | 8          | 7      | 4                   | 2          | 1      | 0                     | 1       | 1         | 5              | 5     | 6       |
| Migratory status           |                  |            |        |                     |            |        |                       |         |           |                |       |         |
| Non-migrant                | 28               | 44         | 44     | 13                  | 40         | 28     | 44                    | 39      | 49        | 30             | 34    | 27      |
| Migrant                    | 22               | 6          | 6      | 37                  | 10         | 22     | 6                     | 11      | 1         | 20             | 16    | 23      |
| Time-in-residence          |                  |            |        |                     |            |        |                       |         |           |                |       |         |
| 0–15 years                 | 18               | 17         | 15     | 19                  | 18         | 20     | 12                    | 10      | 16        | 14             | 18    | 16      |
| 16–30 years                | 17               | 12         | 30     | 11                  | 14         | 13     | 16                    | 10      | 14        | 14             | 11    | 15      |
| >30 years                  | 15               | 21         | 5      | 20                  | 18         | 17     | 22                    | 30      | 20        | 22             | 21    | 19      |
| Transport                  |                  |            |        |                     |            |        |                       |         |           |                |       |         |
| No transport               | 43               | 38         | 33     | 40                  | 42         | 35     | 37                    | 29      | 35        | 35             | 26    | 32      |
| Animal or bike             | 4                | 10         | 13     | 9                   | 5          | 13     | 10                    | 16      | 9         | 12             | 17    | 15      |
| Motorbike, car, or similar | 3                | 2          | 4      | 1                   | 3          | 2      | 3                     | 5       | 6         | 3              | 7     | 3       |
| Tools                      |                  |            |        |                     |            |        |                       |         |           |                |       |         |
| No tools                   | 7                | 5          | 17     | 11                  | 4          | 3      | 19                    | 25      | 27        | 9              | 10    | 11      |
| Basic tools                | 42               | 45         | 30     | 27                  | 45         | 43     | 31                    | 25      | 22        | 40             | 39    | 36      |
| Semi-automatic tools       | 1                | 0          | 3      | 12                  | 1          | 4      | 0                     | 0       | 1         | 1              | 1     | 3       |
| Technological services     |                  |            |        |                     |            |        |                       |         |           |                |       |         |
| Radio, mobile phone, TV    | 19               | 0          | 2      | 3                   | 0          | 0      | 23                    | 24      | 33        | 19             | 6     | 18      |
| Cable TV                   | 22               | 13         | 0      | 23                  | 14         | 16     | 19                    | 17      | 14        | 17             | 17    | 13      |
| Internet                   | 9                | 37         | 48     | 24                  | 36         | 34     | 8                     | 9       | 3         | 14             | 27    | 19      |
| Farm animals               |                  |            |        |                     |            |        |                       |         |           |                |       |         |
| No animals                 | 17               | 6          | 20     | 9                   | 29         | 7      | 9                     | 14      | 20        | 15             | 12    | 11      |

|                          |    |    |    |    |    |    |    |    |    |    |    |    |
|--------------------------|----|----|----|----|----|----|----|----|----|----|----|----|
| 1–15 animals;            | 19 | 23 | 21 | 25 | 12 | 35 | 38 | 30 | 27 | 28 | 21 | 25 |
| >15 animals              | 14 | 21 | 9  | 16 | 9  | 8  | 3  | 6  | 3  | 7  | 17 | 14 |
| Farm size                |    |    |    |    |    |    |    |    |    |    |    |    |
| 0–1 ha                   | 29 | 22 | 31 | 19 | 20 | 25 | 43 | 50 | 42 | 34 | 24 | 28 |
| 1–5 ha                   | 19 | 27 | 13 | 29 | 30 | 23 | 7  | 0  | 7  | 13 | 18 | 18 |
| >5 ha                    | 2  | 1  | 6  | 2  | 0  | 2  | 0  | 0  | 1  | 2  | 8  | 4  |
| House quality            |    |    |    |    |    |    |    |    |    |    |    |    |
| Some defects             | 42 | 47 | 2  | 24 | 30 | 46 | 47 | 46 | 50 | 43 | 35 | 40 |
| Good quality, no defects | 8  | 3  | 48 | 26 | 20 | 4  | 3  | 4  | 0  | 7  | 15 | 10 |
